# Supplementary material for: Modified Lignin-Based Cement Solidifying Material for Improving Engineering Residual Soil
Source: MDPI journal article supplement (doi:10.3390/ma16227100), 2023-11-09
Supplement: s1 [file s1]

## Supporting Information

# Modified Lignin-Based Cement Solidifying Material for Improving Engineering Residual Soil

Xiang Yu <sup>1,2</sup>, Hongbo Lu <sup>1,\*</sup>, Jie Peng <sup>2</sup>, Jinming Ren <sup>1</sup>, Yongmin Wang <sup>1</sup> and Junhao Chen <sup>1</sup>

<sup>1</sup> Power China Huadong Engineering Corporation Limited, Hangzhou 311122, China; yu-xiang@hhu.edu.cn (X.Y.); ren\_jm@hdec.com (J.R.); wang\_ym2@hdec.com (Y.W.); chen\_jh4@hdec.com (J.C.)

<sup>2</sup> College of Civil and Transportation Engineering, Hohai University, Nanjing 210098, China; peng-jie@hhu.edu.cn

\* Correspondence: lu\_hb2@hdec.com; Tel.: +86-13126859770

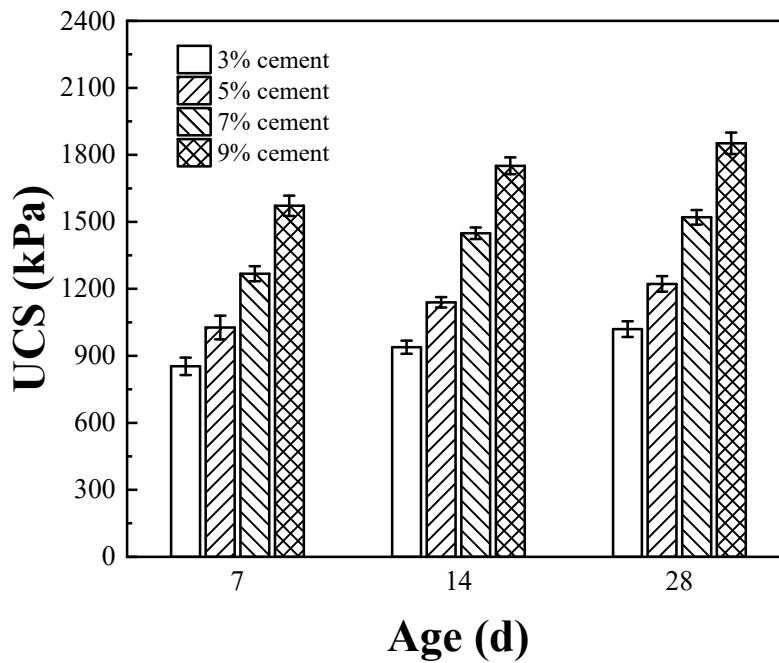

**Figure S1.** Influences of the cement content on the unconfined compressive strengths (UCSs) of cement-solidified soil at 7, 14, and 28 d.

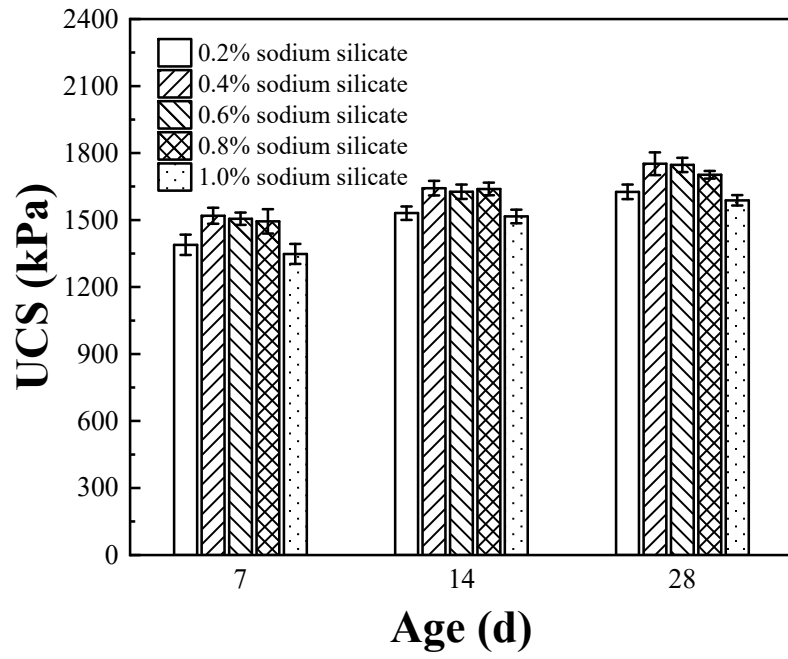

**Figure S2.** Influences of the dosage of sodium silicate on the UCSs of cement-solidified soil at 7, 14, and 28 d.

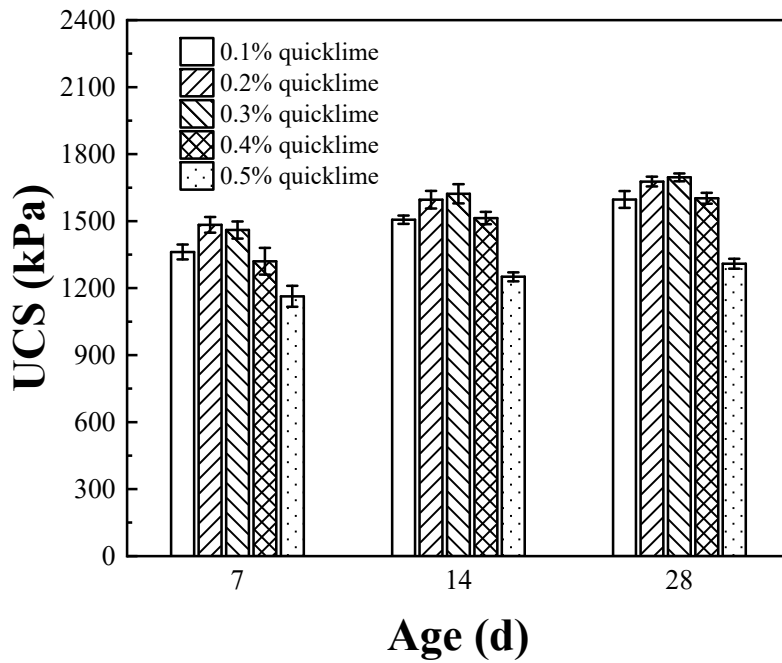

**Figure S3.** Influences of the quicklime content on the UCSs of cement-solidified soil at 7, 14, and 28 d.

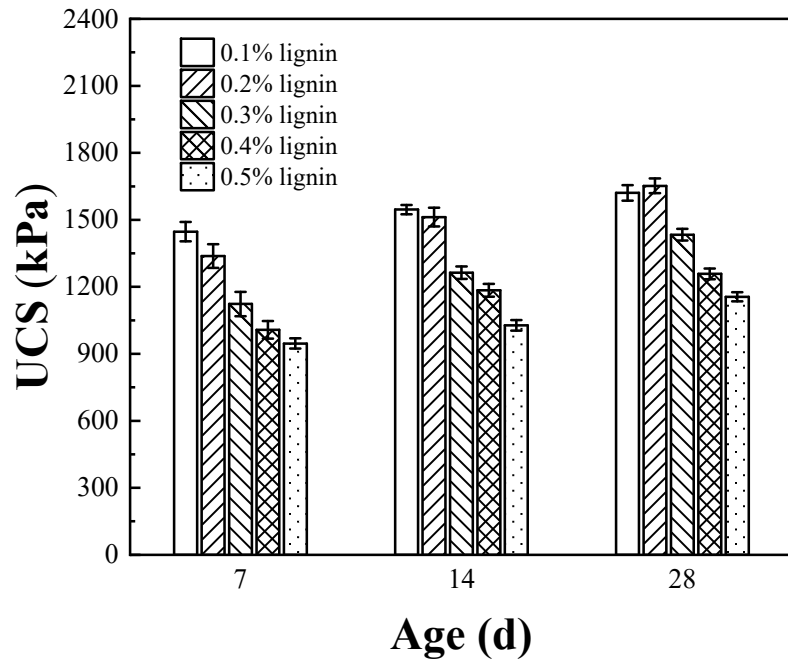

**Figure S4.** Influences of the lignin content on the UCSs of cement-solidified soil at 7, 14, and 28 d.

**Table S1.** Results of orthogonal experiments at different ages.

| Group         | Sodium silicate (%) | Quicklime (%) | Lignin (%) | 7 d UCS<br>(kPa) | 14 d UCS<br>(kPa) | 28 d UCS<br>(kPa) |
|---------------|---------------------|---------------|------------|------------------|-------------------|-------------------|
| 1             | 0.2                 | 0.1           | 0.1        | 1387             | 1508              | 1583              |
| 2             | 0.2                 | 0.2           | 0.15       | 1531             | 1654              | 1738              |
| 3             | 0.2                 | 0.3           | 0.2        | 1432             | 1670              | 1746              |
| 4             | 0.4                 | 0.1           | 0.15       | 1881             | 1980              | 2064              |
| 5             | 0.4                 | 0.2           | 0.2        | 1924             | 2118              | 2209              |
| 6             | 0.4                 | 0.3           | 0.1        | 1611             | 1834              | 1918              |
| 7             | 0.6                 | 0.1           | 0.2        | 1728             | 1835              | 1893              |
| 8             | 0.6                 | 0.2           | 0.1        | 1498             | 1668              | 1731              |
| 9             | 0.6                 | 0.3           | 0.15       | 1561             | 1664              | 1820              |
| Optimal group | 0.4                 | 0.2           | 0.2        | 1924             | 2118              | 2209              |

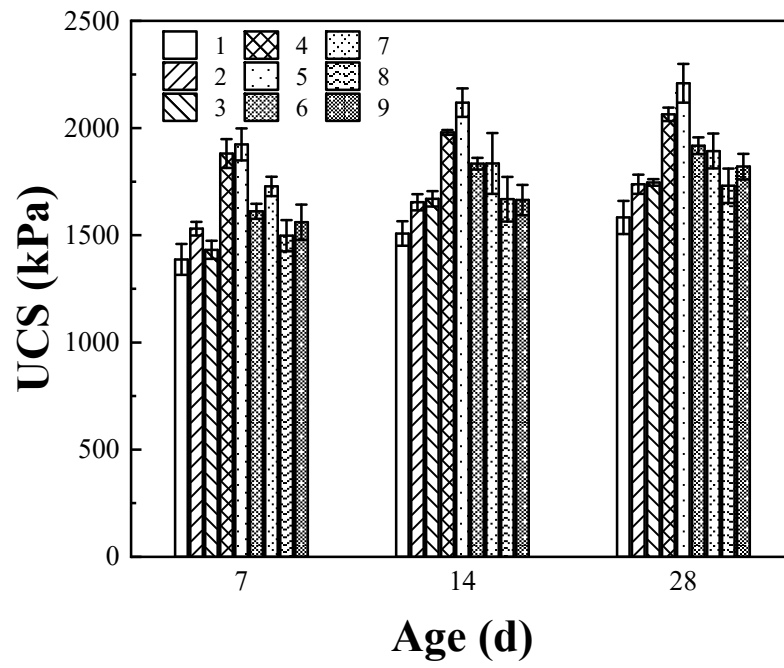

**Figure S5.** UCSs of the different groups used in the orthogonal study at 7, 14, and 28 d.

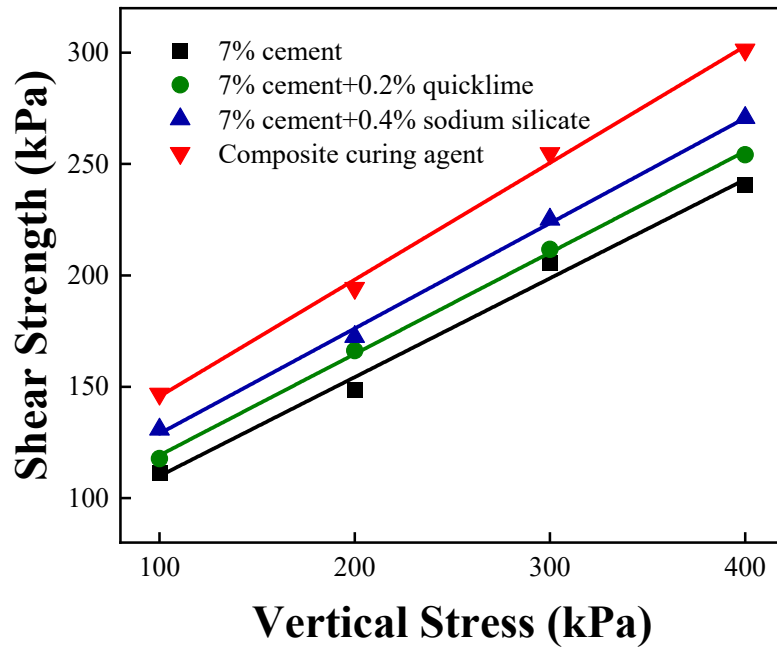

(a) 14 d

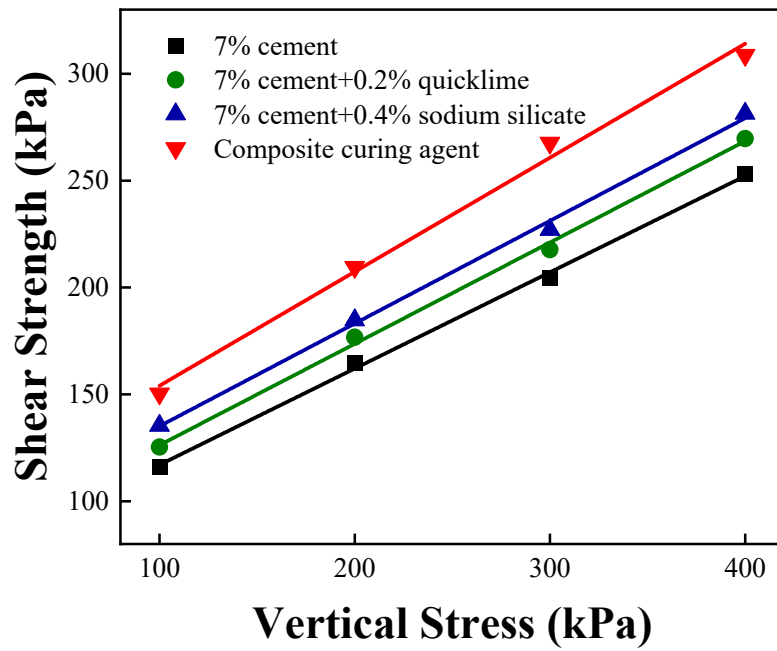

(b) 28 d

**Figure S6.** Relationships between the vertical stresses and shear strengths, as obtained via the 14 and 28 d direct shear studies.

**Table S2.** Levels of cohesion and the internal friction angles of different modifiers at ages of 7, 14, and 28 d.

| Curing agent                       | c (kPa) |      |       | $\varphi$ (°) |      |      |
|------------------------------------|---------|------|-------|---------------|------|------|
|                                    | 7 d     | 14 d | 28 d  | 7 d           | 14 d | 28 d |
| 7 % cement                         | 56.2    | 67.5 | 72.0  | 24.0          | 25.4 | 25.8 |
| 7 % cement + 0.2 % quicklime       | 62.1    | 73.7 | 78.9  | 25.0          | 26.1 | 27.2 |
| 7 % cement + 0.4 % sodium silicate | 67.9    | 81.7 | 87.1  | 26.2          | 27.1 | 27.5 |
| Composite curing agent             | 86.0    | 93.2 | 100.7 | 29.1          | 30.0 | 30.6 |

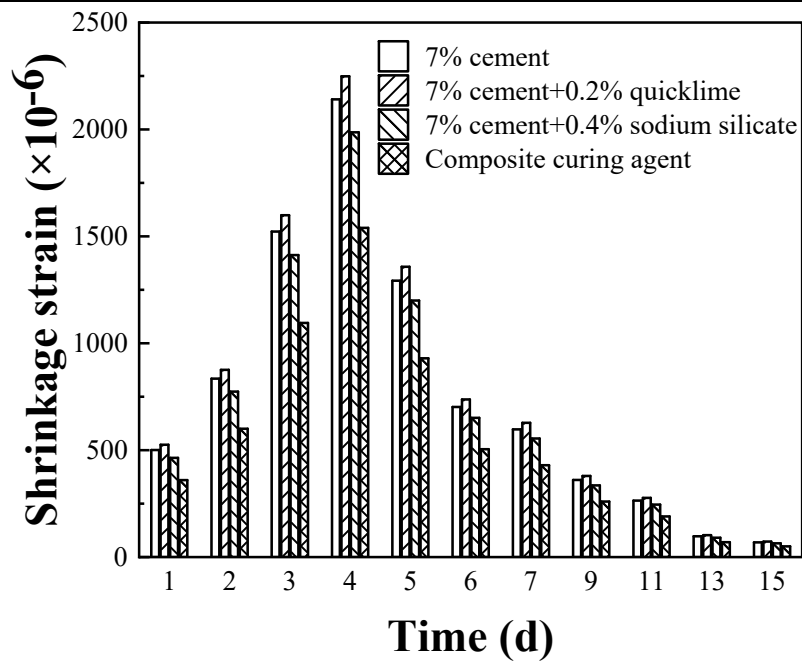

**Figure S7.** Variations in the dry shrinkage strains of cement-solidified soils under different curing agents in the first 15 d.

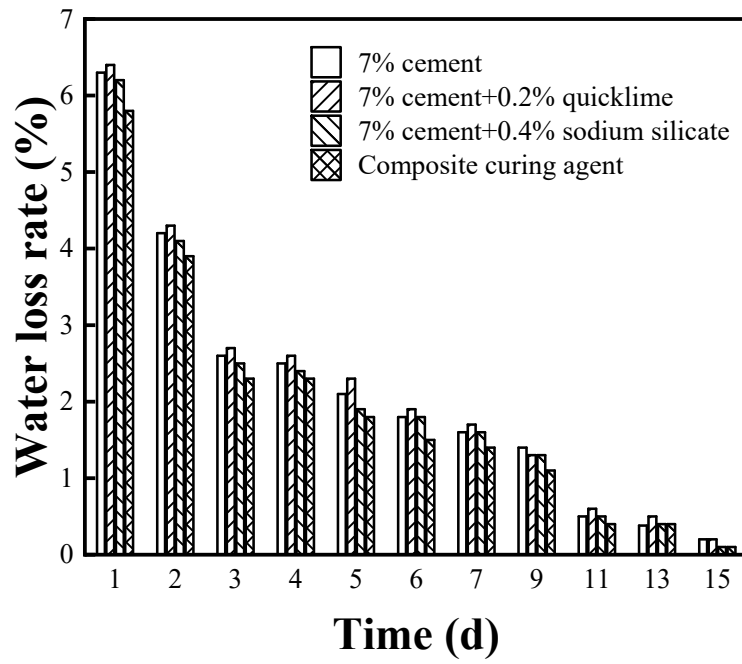

**Figure S8.** Variations in the rates of water loss of cement-solidified soils under different curing agents in the first 15 d.

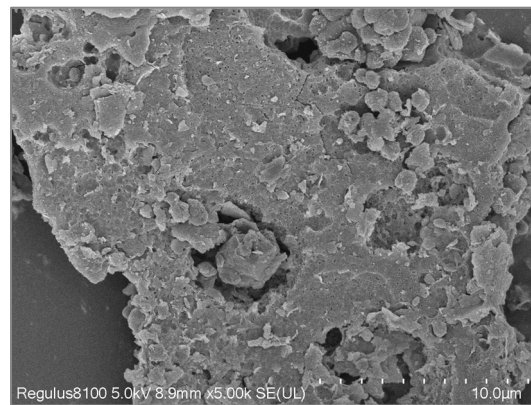

**(a) 5000**

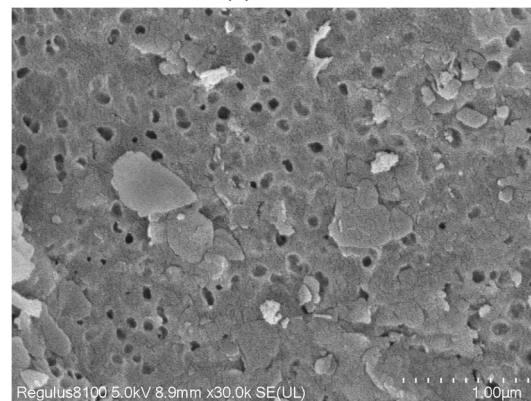

**(b) 30000**

**Figure S9.** Scanning electron microscopy images of plain soil at different magnifications.

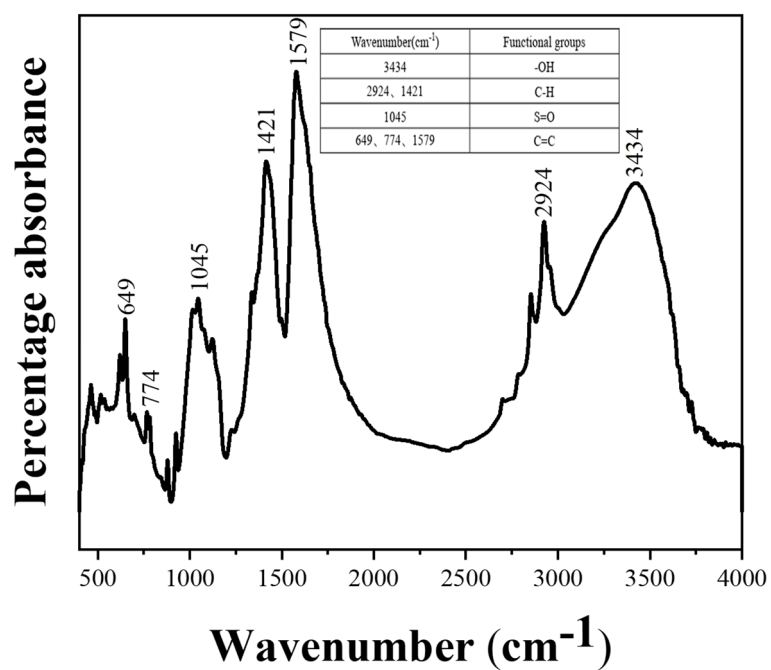

(a) Analysis of lignin functional groups

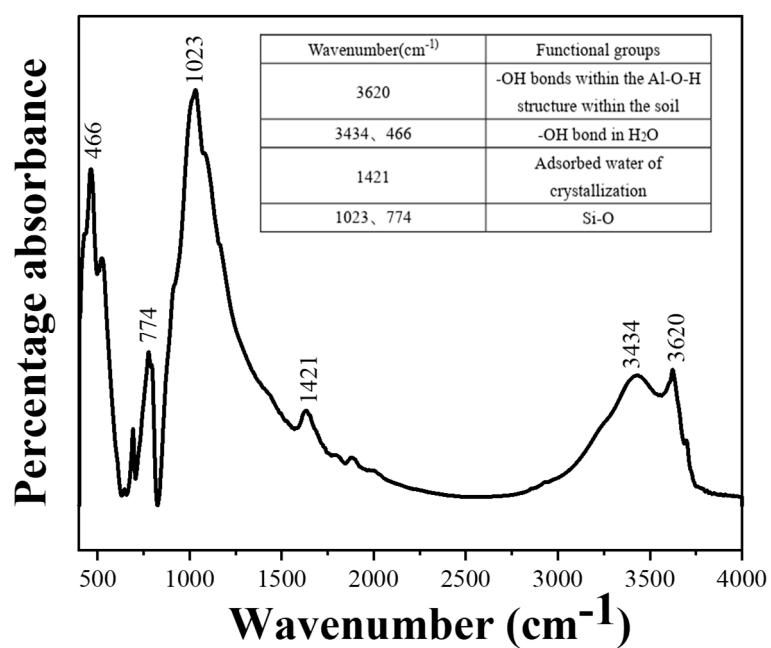

(b) Analysis of soil functional groups

**Figure S10.** Analyses of the functional groups of soil and lignin based on Fourier transform infrared spectroscopy.
